# Supplementary material for: Germline-related molecular phenotype in Metazoa: conservation and innovation highlighted by comparative transcriptomics
Source: Springer Nature journal article supplement (doi:10.1186/s13227-022-00207-3), 2023-01-30
Supplement: MOESM2 [file 13227_2022_207_MOESM2_ESM.pdf]

# Additional Information

|         | <i>Caenorhabditis elegans</i> | <i>Danio rerio</i> | <i>Drosophila melanogaster</i> | <i>Ephydatia fluviatilis</i> | <i>Haliotis rufescens</i> | <i>Nematostella vectensis</i> | <i>Ruditapes philippinarum</i> | <i>Schmidtea mediterranea</i> | <i>Xenopus tropicalis</i> |           |
|---------|-------------------------------|--------------------|--------------------------------|------------------------------|---------------------------|-------------------------------|--------------------------------|-------------------------------|---------------------------|-----------|
| Nanos   | Light blue                    | Light blue         | Light blue                     | Light blue                   | Light blue                | Light blue                    | Light blue                     | Light blue                    | Light blue                | IPR024161 |
|         | Light blue                    | Light blue         | Light blue                     | Light blue                   | Light blue                | Light blue                    | Light blue                     | Light blue                    | Light blue                | IPR008705 |
|         | Light blue                    | Light blue         | Light blue                     | Light blue                   | Light blue                | Light blue                    | Light blue                     | Light blue                    | Light blue                | IPR038129 |
| Vasa    | Light blue                    | Light blue         | Light blue                     | Light blue                   | Light blue                | Light blue                    | Light blue                     | Light blue                    | Light blue                | IPR001650 |
|         | Light blue                    | Light blue         | Light blue                     | Light blue                   | Light blue                | Light blue                    | Light blue                     | Light blue                    | Light blue                | IPR011545 |
|         | Light blue                    | Light blue         | Light blue                     | Light blue                   | Light blue                | Light blue                    | Light blue                     | Light blue                    | Light blue                | IPR014001 |
|         | Light blue                    | Light blue         | Light blue                     | Light blue                   | Light blue                | Light blue                    | Light blue                     | Light blue                    | Light blue                | IPR014014 |
|         | Light blue                    | Light blue         | Light blue                     | Light blue                   | Light blue                | Light blue                    | Light blue                     | Light blue                    | Light blue                | IPR027417 |
|         | Light blue                    | Light blue         | Light blue                     | Light blue                   | Light blue                | Light blue                    | Light blue                     | Light blue                    | Light blue                | IPR000629 |
| Piwi    | Light blue                    | Light blue         | Light blue                     | Light blue                   | Light blue                | Light blue                    | Light blue                     | Light blue                    | Light blue                | IPR036397 |
|         | Light blue                    | Light blue         | Light blue                     | Light blue                   | Light blue                | Light blue                    | Light blue                     | Light blue                    | Light blue                | IPR003100 |
|         | Light blue                    | Light blue         | Light blue                     | Light blue                   | Light blue                | Light blue                    | Light blue                     | Light blue                    | Light blue                | IPR036085 |
|         | Light blue                    | Light blue         | Light blue                     | Light blue                   | Light blue                | Light blue                    | Light blue                     | Light blue                    | Light blue                | IPR003165 |
|         | Light blue                    | Light blue         | Light blue                     | Light blue                   | Light blue                | Light blue                    | Light blue                     | Light blue                    | Light blue                | IPR012337 |
| Boule   | Light blue                    | Light blue         | Light blue                     | Light blue                   | Light blue                | Light blue                    | Light blue                     | Light blue                    | Light blue                | IPR037366 |
|         | Light blue                    | Light blue         | Light blue                     | Light blue                   | Light blue                | Light blue                    | Light blue                     | Light blue                    | Light blue                | IPR000504 |
|         | Light blue                    | Light blue         | Light blue                     | Light blue                   | Light blue                | Light blue                    | Light blue                     | Light blue                    | Light blue                | IPR034988 |
|         | Light blue                    | Light blue         | Light blue                     | Light blue                   | Light blue                | Light blue                    | Light blue                     | Light blue                    | Light blue                | IPR012677 |
|         | Light blue                    | Light blue         | Light blue                     | Light blue                   | Light blue                | Light blue                    | Light blue                     | Light blue                    | Light blue                | IPR035979 |
| Bruno   | Light blue                    | Light blue         | Light blue                     | Light blue                   | Light blue                | Light blue                    | Light blue                     | Light blue                    | Light blue                | IPR000504 |
|         | Light blue                    | Light blue         | Light blue                     | Light blue                   | Light blue                | Light blue                    | Light blue                     | Light blue                    | Light blue                | IPR034196 |
|         | Light blue                    | Light blue         | Light blue                     | Light blue                   | Light blue                | Light blue                    | Light blue                     | Light blue                    | Light blue                | IPR012677 |
|         | Light blue                    | Light blue         | Light blue                     | Light blue                   | Light blue                | Light blue                    | Light blue                     | Light blue                    | Light blue                | IPR035979 |
| Pumilio | Light blue                    | Light blue         | Light blue                     | Light blue                   | Light blue                | Light blue                    | Light blue                     | Light blue                    | Light blue                | IPR033133 |
|         | Light blue                    | Light blue         | Light blue                     | Light blue                   | Light blue                | Light blue                    | Light blue                     | Light blue                    | Light blue                | IPR033712 |
|         | Light blue                    | Light blue         | Light blue                     | Light blue                   | Light blue                | Light blue                    | Light blue                     | Light blue                    | Light blue                | IPR011989 |
|         | Light blue                    | Light blue         | Light blue                     | Light blue                   | Light blue                | Light blue                    | Light blue                     | Light blue                    | Light blue                | IPR016024 |
|         | Light blue                    | Light blue         | Light blue                     | Light blue                   | Light blue                | Light blue                    | Light blue                     | Light blue                    | Light blue                | IPR001313 |
| Tudor   | Light blue                    | Light blue         | Light blue                     | Light blue                   | Light blue                | Light blue                    | Light blue                     | Light blue                    | Light blue                | IPR002999 |

**Additional file 1: Figure S1. GMP genes-associated IPR codes in germline-related samples.** The table represents presence (light blue) or absence (light grey) in different species (columns) of IPR codes annotated for some representative GMP genes (whose transcript upregulation is depicted in Figure 2 of the main text). Considering associated domains and families rather than whole sequence homology improved the signal: for instance, virtually all domains belonging to *vasa* are biased in germline-related samples of all species, even if we could not observe *vasa* homologue upregulation for *C. elegans* and *H. rufescens* (Figure 2 of the main text).

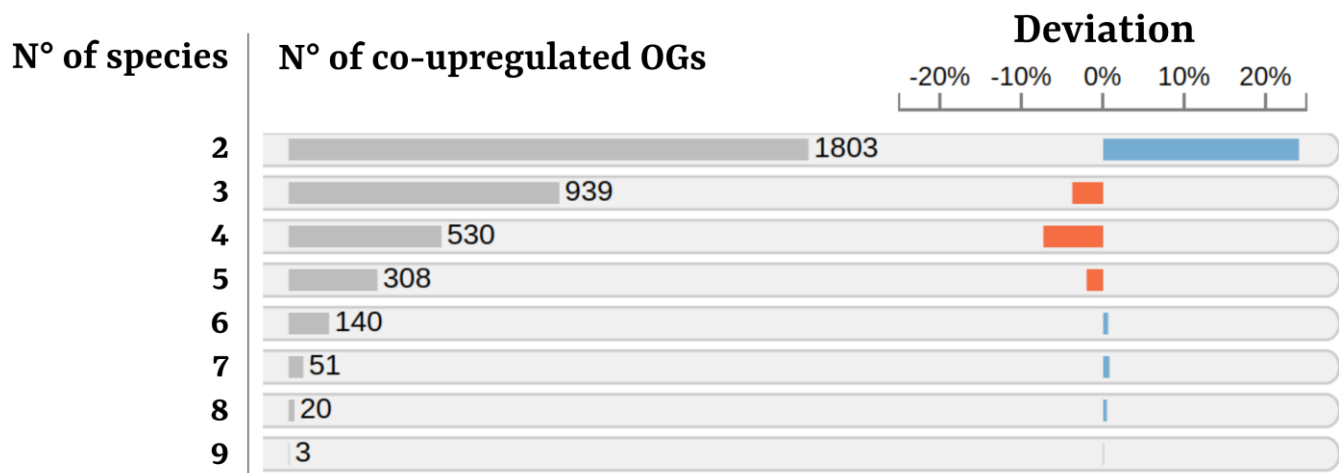

**Additional file 1: Figure S2. Counts of co-upregulated OGs for all combinations of species.** Each row represents the number of OGs that included upregulated germline-related transcripts in a precise number of species (from 2 to 9). For example, first row: 1803 OGs included germline-related upregulated sequences belonging to 2 species only (counting any possible 2-species combination). On the right the deviation from expected random distributions for the combinations of the corresponding number of species is reported: positive deviation from expectation is depicted in blue, negative deviation in red. For instance: the number of observed co-upregulated OGs in 4 species (any 4 species and only 4 species) was lower than expected; the number of observed co-upregulated OGs in 8 species (any 8 species and only 8 species) was higher than expected.



**Additional file 1: Figure S3 (figure in previous page). Co-enriched GO terms (Biological Processes) in 6 or more species.** The table represents presence (light blue) or absence (light grey) in different species (columns) of GO terms enriched in more than 2/3 of the data set.

|            | <i>Caenorhabditis elegans</i> | <i>Danio rerio</i> | <i>Drosophila melanogaster</i> | <i>Ephydatia fluviatilis</i> | <i>Haliotis rufescens</i> | <i>Nematostella vectensis</i> | <i>Ruditapes philippinarum</i> | <i>Schmidtea mediterranea</i> | <i>Xenopus tropicalis</i> |                                                           |
|------------|-------------------------------|--------------------|--------------------------------|------------------------------|---------------------------|-------------------------------|--------------------------------|-------------------------------|---------------------------|-----------------------------------------------------------|
| GO:0003678 | Light Blue                    | Light Blue         | Light Blue                     | Light Blue                   | Light Grey                | Light Blue                    | Light Blue                     | Light Blue                    | Light Blue                | DNA helicase activity                                     |
| GO:0003684 | Light Blue                    | Light Grey         | Light Blue                     | Light Blue                   | Light Grey                | Light Grey                    | Light Blue                     | Light Blue                    | Light Blue                | damaged DNA binding                                       |
| GO:0004386 | Light Blue                    | Light Blue         | Light Blue                     | Light Blue                   | Light Grey                | Light Blue                    | Light Blue                     | Light Blue                    | Light Blue                | helicase activity                                         |
| GO:0004518 | Light Blue                    | Light Blue         | Light Blue                     | Light Blue                   | Light Grey                | Light Blue                    | Light Blue                     | Light Blue                    | Light Blue                | nuclease activity                                         |
| GO:0004519 | Light Blue                    | Light Blue         | Light Blue                     | Light Blue                   | Light Grey                | Light Blue                    | Light Blue                     | Light Blue                    | Light Blue                | endonuclease activity                                     |
| GO:0004527 | Light Blue                    | Light Blue         | Light Blue                     | Light Blue                   | Light Grey                | Light Blue                    | Light Blue                     | Light Blue                    | Light Blue                | exonuclease activity                                      |
| GO:0008094 | Light Grey                    | Light Blue         | Light Blue                     | Light Blue                   | Light Grey                | Light Blue                    | Light Blue                     | Light Blue                    | Light Blue                | DNA-dependent ATPase activity                             |
| GO:0008170 | Light Grey                    | Light Blue         | Light Blue                     | Light Blue                   | Light Grey                | Light Blue                    | Light Blue                     | Light Blue                    | Light Blue                | N-methyltransferase activity                              |
| GO:0008173 | Light Grey                    | Light Blue         | Light Blue                     | Light Blue                   | Light Grey                | Light Blue                    | Light Blue                     | Light Blue                    | Light Blue                | RNA methyltransferase activity                            |
| GO:0008276 | Light Grey                    | Light Blue         | Light Blue                     | Light Blue                   | Light Grey                | Light Blue                    | Light Blue                     | Light Blue                    | Light Blue                | protein methyltransferase activity                        |
| GO:0008536 | Light Grey                    | Light Grey         | Light Blue                     | Light Blue                   | Light Grey                | Light Blue                    | Light Blue                     | Light Blue                    | Light Blue                | Ran GTPase binding                                        |
| GO:0008757 | Light Grey                    | Light Blue         | Light Blue                     | Light Blue                   | Light Grey                | Light Blue                    | Light Blue                     | Light Blue                    | Light Blue                | S-adenosylmethionine-dependent methyltransferase activity |
| GO:0009982 | Light Grey                    | Light Blue         | Light Blue                     | Light Blue                   | Light Grey                | Light Blue                    | Light Blue                     | Light Blue                    | Light Blue                | pseudouridine synthase activity                           |
| GO:0016273 | Light Grey                    | Light Blue         | Light Blue                     | Light Blue                   | Light Grey                | Light Blue                    | Light Blue                     | Light Blue                    | Light Blue                | arginine N-methyltransferase activity                     |
| GO:0016274 | Light Grey                    | Light Blue         | Light Blue                     | Light Blue                   | Light Grey                | Light Blue                    | Light Blue                     | Light Blue                    | Light Blue                | protein-arginine N-methyltransferase activity             |
| GO:0030983 | Light Blue                    | Light Grey         | Light Blue                     | Light Blue                   | Light Grey                | Light Blue                    | Light Blue                     | Light Blue                    | Light Blue                | mismatched DNA binding                                    |
| GO:0043139 | Light Grey                    | Light Blue         | Light Grey                     | Light Blue                   | Light Grey                | Light Blue                    | Light Blue                     | Light Blue                    | Light Blue                | 5'-3' DNA helicase activity                               |
| GO:0140097 | Light Blue                    | Light Blue         | Light Blue                     | Light Grey                   | Light Grey                | Light Blue                    | Light Blue                     | Light Blue                    | Light Blue                | catalytic activity, acting on DNA                         |

**Additional file 1: Figure S4. Co-enriched GO terms (Molecular Functions) in 6 or more species.** The table represents presence (light blue) or absence (light grey) in different species (columns) of GO terms enriched in more than 2/3 of the data set.



|           | <i>Caenorhabditis elegans</i> | <i>Danio rerio</i> | <i>Drosophila melanogaster</i> | <i>Ephydatia fluviatilis</i> | <i>Haliotis rufescens</i> | <i>Nematostella vectensis</i> | <i>Ruditapes philippinarum</i> | <i>Schmidtea mediterranea</i> | <i>Xenopus tropicalis</i> |                                                                                |
|-----------|-------------------------------|--------------------|--------------------------------|------------------------------|---------------------------|-------------------------------|--------------------------------|-------------------------------|---------------------------|--------------------------------------------------------------------------------|
| IPR000253 |                               |                    |                                |                              |                           |                               |                                |                               |                           | Forkhead-associated (FHA) domain                                               |
| IPR000398 |                               |                    |                                |                              |                           |                               |                                |                               |                           | Thymidylate synthase                                                           |
| IPR000504 |                               |                    |                                |                              |                           |                               |                                |                               |                           | RNA recognition motif domain                                                   |
| IPR001352 |                               |                    |                                |                              |                           |                               |                                |                               |                           | Ribonuclease HII/HIII                                                          |
| IPR001357 |                               |                    |                                |                              |                           |                               |                                |                               |                           | BRCT domain                                                                    |
| IPR001494 |                               |                    |                                |                              |                           |                               |                                |                               |                           | Importin-beta, N-terminal domain                                               |
| IPR003750 |                               |                    |                                |                              |                           |                               |                                |                               |                           | Putative RNA methyltransferase                                                 |
| IPR004582 |                               |                    |                                |                              |                           |                               |                                |                               |                           | Checkpoint protein Rad17/Rad24                                                 |
| IPR004584 |                               |                    |                                |                              |                           |                               |                                |                               |                           | DNA repair protein Rad50, eukaryotes                                           |
| IPR004803 |                               |                    |                                |                              |                           |                               |                                |                               |                           | tRNA-guanine transglycosylase                                                  |
| IPR005550 |                               |                    |                                |                              |                           |                               |                                |                               |                           | Kinetochore protein Ndc80                                                      |
| IPR006084 |                               |                    |                                |                              |                           |                               |                                |                               |                           | XPG/Rad2 endonuclease                                                          |
| IPR006085 |                               |                    |                                |                              |                           |                               |                                |                               |                           | XPG, N-terminal                                                                |
| IPR006086 |                               |                    |                                |                              |                           |                               |                                |                               |                           | XPG-I domain                                                                   |
| IPR006133 |                               |                    |                                |                              |                           |                               |                                |                               |                           | DNA-directed DNA polymerase, family B, exonuclease domain                      |
| IPR006166 |                               |                    |                                |                              |                           |                               |                                |                               |                           | ERCC4 domain                                                                   |
| IPR006554 |                               |                    |                                |                              |                           |                               |                                |                               |                           | Helicase-like, DEXD box c2 type                                                |
| IPR007019 |                               |                    |                                |                              |                           |                               |                                |                               |                           | Surfeit locus 6                                                                |
| IPR007146 |                               |                    |                                |                              |                           |                               |                                |                               |                           | Sas10/Utp3/C1D                                                                 |
| IPR007174 |                               |                    |                                |                              |                           |                               |                                |                               |                           | Las1                                                                           |
| IPR007185 |                               |                    |                                |                              |                           |                               |                                |                               |                           | DNA polymerase alpha/delta/epsilon, subunit B                                  |
| IPR007238 |                               |                    |                                |                              |                           |                               |                                |                               |                           | DNA primase large subunit, eukaryotic/archaeal                                 |
| IPR007252 |                               |                    |                                |                              |                           |                               |                                |                               |                           | Nuclear pore protein 84/107                                                    |
| IPR007287 |                               |                    |                                |                              |                           |                               |                                |                               |                           | Soft-like protein                                                              |
| IPR007502 |                               |                    |                                |                              |                           |                               |                                |                               |                           | Helicase-associated domain                                                     |
| IPR007807 |                               |                    |                                |                              |                           |                               |                                |                               |                           | Helicase domain                                                                |
| IPR007846 |                               |                    |                                |                              |                           |                               |                                |                               |                           | RNA-recognition motif (RRM) Nup35-type domain                                  |
| IPR007857 |                               |                    |                                |                              |                           |                               |                                |                               |                           | Protein arginine N-methyltransferase PRMT5                                     |
| IPR008048 |                               |                    |                                |                              |                           |                               |                                |                               |                           | DNA replication licensing factor Mcm5                                          |
| IPR008049 |                               |                    |                                |                              |                           |                               |                                |                               |                           | DNA replication licensing factor Mcm6                                          |
| IPR008705 |                               |                    |                                |                              |                           |                               |                                |                               |                           | Nanos/Xcat2                                                                    |
| IPR008918 |                               |                    |                                |                              |                           |                               |                                |                               |                           | Helix-hairpin-helix motif, class 2                                             |
| IPR009361 |                               |                    |                                |                              |                           |                               |                                |                               |                           | RZZ complex, subunit Zw10                                                      |
| IPR010666 |                               |                    |                                |                              |                           |                               |                                |                               |                           | Zinc finger, GRF-type                                                          |
| IPR010920 |                               |                    |                                |                              |                           |                               |                                |                               |                           | LSM domain superfamily                                                         |
| IPR011023 |                               |                    |                                |                              |                           |                               |                                |                               |                           | Nop2p                                                                          |
| IPR011145 |                               |                    |                                |                              |                           |                               |                                |                               |                           | Scavenger mRNA decapping enzyme, N-terminal                                    |
| IPR011760 |                               |                    |                                |                              |                           |                               |                                |                               |                           | Pseudouridine synthase, TruD, insertion domain                                 |
| IPR011989 |                               |                    |                                |                              |                           |                               |                                |                               |                           | Armadillo-like helical                                                         |
| IPR011990 |                               |                    |                                |                              |                           |                               |                                |                               |                           | Tetratricopeptide-like helical domain superfamily                              |
| IPR012677 |                               |                    |                                |                              |                           |                               |                                |                               |                           | Nucleotide-binding alpha-beta plait domain superfamily                         |
| IPR012978 |                               |                    |                                |                              |                           |                               |                                |                               |                           | Uncharacterised domain NUC173                                                  |
| IPR013026 |                               |                    |                                |                              |                           |                               |                                |                               |                           | Tetratricopeptide repeat-containing domain                                     |
| IPR013083 |                               |                    |                                |                              |                           |                               |                                |                               |                           | Zinc finger, RING/FYVE/PHD-type                                                |
| IPR013346 |                               |                    |                                |                              |                           |                               |                                |                               |                           | Ribonucleotide reductase, class 1, alpha subunit                               |
| IPR013562 |                               |                    |                                |                              |                           |                               |                                |                               |                           | tRNA(Met) cytidine acetyltransferase TmcA, N-terminal                          |
| IPR013748 |                               |                    |                                |                              |                           |                               |                                |                               |                           | Replication factor C, C-terminal                                               |
| IPR013763 |                               |                    |                                |                              |                           |                               |                                |                               |                           | Cyclin-like                                                                    |
| IPR013876 |                               |                    |                                |                              |                           |                               |                                |                               |                           | TFIIH p62 subunit, N-terminal                                                  |
| IPR014013 |                               |                    |                                |                              |                           |                               |                                |                               |                           | Helicase superfamily 1/2, ATP-binding domain, DinG/Rad3-type                   |
| IPR015088 |                               |                    |                                |                              |                           |                               |                                |                               |                           | Zinc finger, DNA-directed DNA polymerase, family B, alpha                      |
| IPR015163 |                               |                    |                                |                              |                           |                               |                                |                               |                           | Cdc6, C-terminal                                                               |
| IPR015408 |                               |                    |                                |                              |                           |                               |                                |                               |                           | Zinc finger, Mcm10/DnaG-type                                                   |
| IPR016558 |                               |                    |                                |                              |                           |                               |                                |                               |                           | DNA primase, large subunit, eukaryotic                                         |
| IPR017389 |                               |                    |                                |                              |                           |                               |                                |                               |                           | Nucleoporin, NUP53                                                             |
| IPR019136 |                               |                    |                                |                              |                           |                               |                                |                               |                           | Transcription factor IIIC subunit 5, HTH domain                                |
| IPR019496 |                               |                    |                                |                              |                           |                               |                                |                               |                           | Nuclear fragile X mental retardation-interacting protein 1, conserved domain   |
| IPR019544 |                               |                    |                                |                              |                           |                               |                                |                               |                           | Tetratricopeptide, SHNi-TPR domain                                             |
| IPR019734 |                               |                    |                                |                              |                           |                               |                                |                               |                           | Tetratricopeptide repeat                                                       |
| IPR020103 |                               |                    |                                |                              |                           |                               |                                |                               |                           | Pseudouridine synthase, catalytic domain superfamily                           |
| IPR020472 |                               |                    |                                |                              |                           |                               |                                |                               |                           | G-protein beta WD-40 repeat                                                    |
| IPR020568 |                               |                    |                                |                              |                           |                               |                                |                               |                           | Ribosomal protein S5 domain 2-type fold                                        |
| IPR020588 |                               |                    |                                |                              |                           |                               |                                |                               |                           | DNA recombination and repair protein RecA-like, ATP-binding domain             |
| IPR020795 |                               |                    |                                |                              |                           |                               |                                |                               |                           | Origin recognition complex, subunit 3                                          |
| IPR020796 |                               |                    |                                |                              |                           |                               |                                |                               |                           | Origin recognition complex, subunit 5                                          |
| IPR022043 |                               |                    |                                |                              |                           |                               |                                |                               |                           | Chromatin assembly factor 1 subunit A                                          |
| IPR022100 |                               |                    |                                |                              |                           |                               |                                |                               |                           | Minichromosome loss protein Mcl1, middle region                                |
| IPR023211 |                               |                    |                                |                              |                           |                               |                                |                               |                           | DNA polymerase, palm domain superfamily                                        |
| IPR023273 |                               |                    |                                |                              |                           |                               |                                |                               |                           | RNA (C5-cytosine) methyltransferase, NOP2                                      |
| IPR023451 |                               |                    |                                |                              |                           |                               |                                |                               |                           | Thymidylate synthase/dCMP hydroxymethylase domain                              |
| IPR024166 |                               |                    |                                |                              |                           |                               |                                |                               |                           | Ribosomal RNA assembly KRR1                                                    |
| IPR024567 |                               |                    |                                |                              |                           |                               |                                |                               |                           | Ribonuclease HII/HIII domain                                                   |
| IPR024576 |                               |                    |                                |                              |                           |                               |                                |                               |                           | Ribosomal RNA methyltransferase Spb1, domain of unknown function DUF381        |
| IPR024639 |                               |                    |                                |                              |                           |                               |                                |                               |                           | DNA polymerase epsilon subunit B, N-terminal                                   |
| IPR024647 |                               |                    |                                |                              |                           |                               |                                |                               |                           | DNA polymerase alpha catalytic subunit, N-terminal domain                      |
| IPR024790 |                               |                    |                                |                              |                           |                               |                                |                               |                           | Anaphase-promoting complex subunit 4 long domain                               |
| IPR026851 |                               |                    |                                |                              |                           |                               |                                |                               |                           | DNA replication ATP-dependent helicase/nuclease Dna2                           |
| IPR027408 |                               |                    |                                |                              |                           |                               |                                |                               |                           | PNPase/RNase PH domain superfamily                                             |
| IPR027973 |                               |                    |                                |                              |                           |                               |                                |                               |                           | Protein of unknown function DUF4602                                            |
| IPR028077 |                               |                    |                                |                              |                           |                               |                                |                               |                           | Ubiquitin/SUMO-activating enzyme ubiquitin-like domain                         |
| IPR028589 |                               |                    |                                |                              |                           |                               |                                |                               |                           | AdoMet-dependent tRNA methyltransferase Spb1-like                              |
| IPR029026 |                               |                    |                                |                              |                           |                               |                                |                               |                           | tRNA (guanine-N1-)methyltransferase, N-terminal                                |
| IPR029028 |                               |                    |                                |                              |                           |                               |                                |                               |                           | Alpha/beta knot methyltransferases                                             |
| IPR029190 |                               |                    |                                |                              |                           |                               |                                |                               |                           | Ribosomal RNA-processing protein 14/surfeit locus protein 6, C-terminal domain |
| IPR029448 |                               |                    |                                |                              |                           |                               |                                |                               |                           | Fanconi anaemia protein FANCD2                                                 |
| IPR030475 |                               |                    |                                |                              |                           |                               |                                |                               |                           | Ribonucleotide reductase small subunit, active site                            |
| IPR031341 |                               |                    |                                |                              |                           |                               |                                |                               |                           | Ribosomal RNA small subunit methyltransferase F, N-terminal                    |
| IPR032682 |                               |                    |                                |                              |                           |                               |                                |                               |                           | Condensin complex subunit 1, C-terminal                                        |
| IPR033310 |                               |                    |                                |                              |                           |                               |                                |                               |                           | Mms4/EME1/EME2                                                                 |
| IPR033809 |                               |                    |                                |                              |                           |                               |                                |                               |                           | USP39                                                                          |
| IPR033909 |                               |                    |                                |                              |                           |                               |                                |                               |                           | Ribonucleotide reductase small subunit                                         |
| IPR034159 |                               |                    |                                |                              |                           |                               |                                |                               |                           | SF3B4, RNA recognition motif 2                                                 |
| IPR035247 |                               |                    |                                |                              |                           |                               |                                |                               |                           | PRMT5, TIM barrel domain                                                       |
| IPR035248 |                               |                    |                                |                              |                           |                               |                                |                               |                           | PRMT5, oligomerisation domain                                                  |
| IPR035979 |                               |                    |                                |                              |                           |                               |                                |                               |                           | RNA-binding domain superfamily                                                 |
| IPR036236 |                               |                    |                                |                              |                           |                               |                                |                               |                           | Zinc finger C2H2 superfamily                                                   |
| IPR036279 |                               |                    |                                |                              |                           |                               |                                |                               |                           | 5'-3' exonuclease, C-terminal domain superfamily                               |
| IPR036322 |                               |                    |                                |                              |                           |                               |                                |                               |                           | WD40-repeat-containing domain superfamily                                      |
| IPR036345 |                               |                    |                                |                              |                           |                               |                                |                               |                           | Exoribonuclease, PH domain 2 superfamily                                       |
| IPR036390 |                               |                    |                                |                              |                           |                               |                                |                               |                           | Winged helix DNA-binding domain superfamily                                    |
| IPR036855 |                               |                    |                                |                              |                           |                               |                                |                               |                           | Zinc finger, CCH-type superfamily                                              |
| IPR036926 |                               |                    |                                |                              |                           |                               |                                |                               |                           | Thymidylate synthase/dCMP hydroxymethylase superfamily                         |
| IPR037624 |                               |                    |                                |                              |                           |                               |                                |                               |                           | Nuclear pore complex protein Nup133-like                                       |
| IPR037626 |                               |                    |                                |                              |                           |                               |                                |                               |                           | Nucleoporin Nup37                                                              |
| IPR037942 |                               |                    |                                |                              |                           |                               |                                |                               |                           | RuvB-like helicase 2                                                           |
| IPR038256 |                               |                    |                                |                              |                           |                               |                                |                               |                           | DNA polymerase alpha, zinc finger domain superfamily                           |
| IPR038273 |                               |                    |                                |                              |                           |                               |                                |                               |                           | Ndc80 domain superfamily                                                       |
| IPR040184 |                               |                    |                                |                              |                           |                               |                                |                               |                           | Minichromosome maintenance protein 10                                          |
| IPR040454 |                               |                    |                                |                              |                           |                               |                                |                               |                           | Transcription factor IIIC subunit Tfc1/Sfc1                                    |
| IPR043519 |                               |                    |                                |                              |                           |                               |                                |                               |                           | Nucleotidyltransferase superfamily                                             |

**Additional file 1: Figure S6 (figure in previous page). Co-enriched IPR codes in 6 species.** The table represents presence (light blue) or absence (light grey) in different species (columns). Code annotation that refer to strictly DNA-related or proliferative activities are highlighted in bold. Codes associated to DNA repair are highlighted in red.

**Additional file 1: Table S1. Species in the data set and accession codes of Genome assemblies.**

When the proteome was retrieved from an online source different from NCBI, the whole accession link is present. Phyla are in alphabetical order, with the four non-Metazoa phyla at the bottom of the table.

| <b>Phylum</b>              | <b>Species</b>                        | <b>Genome code / database</b> |
|----------------------------|---------------------------------------|-------------------------------|
| <b>ANNELIDA</b>            | <i>Capitella teleta</i>               | GCA_000328365.1               |
|                            | <i>Dimorphilus gyrocoliliatus</i>     | GCA_904063045.1               |
|                            | <i>Helobdella robusta</i>             | GCF_000326865.1               |
|                            | <i>Owenia fusiformis</i>              | GCA_903813345.1               |
| <b>ARTHROPODA</b>          | <i>Aphis gossypii</i>                 | GCF_004010815.1               |
|                            | <i>Apis mellifera</i>                 | GCF_003254395.2               |
|                            | <i>Centruroides sculpturatus</i>      | GCF_000671375.1               |
|                            | <i>Cloeon dipterum</i>                | GCA_902829235.1               |
|                            | <i>Cryptotermes secundus</i>          | GCF_002891405.2               |
|                            | <i>Ctenocephalides felis</i>          | GCF_003426905.1               |
|                            | <i>Daphnia magna</i>                  | GCF_003990815.1               |
|                            | <i>Dermatophagoides pteronyssinus</i> | GCF_001901225.1               |
|                            | <i>Drosophila melanogaster</i>        | GCF_000001215.4               |
|                            | <i>Eurytemora affinis</i>             | GCF_000591075.1               |
|                            | <i>Folsomia candida</i>               | GCF_002217175.1               |
|                            | <i>Hyalella azteca</i>                | GCF_000764305.1               |
|                            | <i>Ixodes scapularis</i>              | GCF_002892825.2               |
|                            | <i>Lepeophtheirus salmonis</i>        | GCF_016086655.3               |
|                            | <i>Limulus polyphemus</i>             | GCF_000517525.1               |
|                            | <i>Nymphon striatum</i>               | GCA_016618385.1               |
|                            | <i>Parasteatoda tepidariorum</i>      | GCF_000365465.2               |
|                            | <i>Penaeus vannamei</i>               | GCF_003789085.1               |
|                            | <i>Sitophilus oryzae</i>              | GCF_002938485.1               |
| <i>Tetranychus urticae</i> | GCF_000239435.1                       |                               |
| <i>Varroa destructor</i>   | GCF_002443255.1                       |                               |
| <b>BRACHIPODA</b>          | <i>Lingula anatina</i>                | GCF_001039355.2               |

|                      |                                      |                                                                                                                                                                                                         |
|----------------------|--------------------------------------|---------------------------------------------------------------------------------------------------------------------------------------------------------------------------------------------------------|
| <b>BRIOZOA</b>       | <i>Bugula neritina</i>               | GCA_010799875.2                                                                                                                                                                                         |
| <b>CHORDATA</b>      | <i>Acipenser ruthenus</i>            | GCF_010645085.1                                                                                                                                                                                         |
|                      | <i>Amblyraja radiata</i>             | GCF_010909765.1                                                                                                                                                                                         |
|                      | <i>Branchiostoma floridae</i>        | GCF_000003815.2                                                                                                                                                                                         |
|                      | <i>Ciona intestinalis</i>            | GCF_000224145.3                                                                                                                                                                                         |
|                      | <i>Danio rerio</i>                   | GCF_000002035.6                                                                                                                                                                                         |
|                      | <i>Gallus gallus</i>                 | GCF_000002315.6                                                                                                                                                                                         |
|                      | <i>Gekko japonicus</i>               | GCF_001447785.1                                                                                                                                                                                         |
|                      | <i>Homo sapiens</i>                  | GCF_000001405.39                                                                                                                                                                                        |
|                      | <i>Oikopleura dioica</i>             | GCA_000209555.1                                                                                                                                                                                         |
|                      | <i>Petromyzon marinus</i>            | GCF_010993605.1                                                                                                                                                                                         |
|                      | <i>Styela clava</i>                  | GCF_013122585.1                                                                                                                                                                                         |
|                      | <i>Xenopus tropicalis</i>            | GCF_000004195.4                                                                                                                                                                                         |
| <b>CNIDARIA</b>      | <i>Acropora digitifera</i>           | GCF_000222465.1                                                                                                                                                                                         |
|                      | <i>Actinia tenebrosa</i>             | GCF_009602425.1                                                                                                                                                                                         |
|                      | <i>Aurelia aurita</i>                | <a href="https://marinegenomics.oist.jp/aurelia_aurita/">https://marinegenomics.oist.jp/aurelia_aurita/</a>                                                                                             |
|                      | <i>Clytia hemisphaerica</i>          | <a href="http://ftp.ensemblgenomes.org/pub/metazoa/release-52/fasta/clytia_hemisphaerica_gca902728285">http://ftp.ensemblgenomes.org/pub/metazoa/release-52/fasta/clytia_hemisphaerica_gca902728285</a> |
|                      | <i>Dendronephthya gigantea</i>       | GCF_004324835.1                                                                                                                                                                                         |
|                      | <i>Exaiptasia diaphana</i>           | GCF_001417965.1                                                                                                                                                                                         |
|                      | <i>Henneguya salminicola</i>         | GCA_009887335.1                                                                                                                                                                                         |
|                      | <i>Hydra vulgaris</i>                | GCF_000004095.1                                                                                                                                                                                         |
|                      | <i>Morbakka virulenta</i>            | <a href="https://marinegenomics.oist.jp/morbakka_virulenta/">https://marinegenomics.oist.jp/morbakka_virulenta/</a>                                                                                     |
|                      | <i>Myxobolus squamalis</i>           | GCA_010108815.1                                                                                                                                                                                         |
|                      | <i>Nematostella vectensis</i>        | GCF_000209225.1                                                                                                                                                                                         |
|                      | <i>Orbicella faveolata</i>           | GCF_002042975.1                                                                                                                                                                                         |
|                      | <i>Pocillopora damicornis</i>        | GCF_003704095.1                                                                                                                                                                                         |
|                      | <i>Stylophora pistillata</i>         | GCF_002571385.1                                                                                                                                                                                         |
|                      | <i>Thelohanellus kitauei</i>         | GCA_000827895.1                                                                                                                                                                                         |
| <b>CTENOPHORA</b>    | <i>Hormiphora californiensis</i>     | <a href="https://github.com/conchoecia/hormiphora">https://github.com/conchoecia/hormiphora</a>                                                                                                         |
|                      | <i>Mnemiopsis leidyi</i>             | <a href="https://research.nhgri.nih.gov/mnemiopsis">https://research.nhgri.nih.gov/mnemiopsis</a>                                                                                                       |
| <b>ECHINODERMATA</b> | <i>Anneissia japonica</i>            | GCF_011630105.1                                                                                                                                                                                         |
|                      | <i>Apostichopus japonicus</i>        | GCA_002754855.1                                                                                                                                                                                         |
|                      | <i>Asterias rubens</i>               | GCF_902459465.1                                                                                                                                                                                         |
|                      | <i>Strongylocentrotus purpuratus</i> | GCF_000002235.5                                                                                                                                                                                         |
| <b>HEMICHORDATA</b>  | <i>Ptychodera flava</i>              | <a href="https://marinegenomics.oist.jp/acornworm/">https://marinegenomics.oist.jp/acornworm/</a>                                                                                                       |
|                      | <i>Saccoglossus kowalevskii</i>      | GCF_000003605.2                                                                                                                                                                                         |
| <b>MOLLUSCA</b>      | <i>Aplysia californica</i>           | GCF_000002075.1                                                                                                                                                                                         |
|                      | <i>Biomphalaria glabrata</i>         | GCF_000457365.1                                                                                                                                                                                         |
|                      | <i>Crassostrea gigas</i>             | GCF_902806645.1                                                                                                                                                                                         |
|                      | <i>Lottia gigantea</i>               | GCF_000327385.1                                                                                                                                                                                         |
|                      | <i>Mizuhopecten yessoensis</i>       | GCF_002113885.1                                                                                                                                                                                         |
|                      | <i>Octopus bimaculoides</i>          | GCF_001194135.1                                                                                                                                                                                         |
|                      | <i>Pomacea canaliculata</i>          | GCF_003073045.1                                                                                                                                                                                         |
| <b>NEMATODA</b>      | <i>Aphelenchus avenae</i>            | GCA_020875895.1                                                                                                                                                                                         |
|                      | <i>Brugia malayi</i>                 | GCF_000002995.3                                                                                                                                                                                         |



|                          |                                     |                                                                                                                                                                                                                                                                                                   |
|--------------------------|-------------------------------------|---------------------------------------------------------------------------------------------------------------------------------------------------------------------------------------------------------------------------------------------------------------------------------------------------|
|                          | <i>Bursaphelenchus okinawaensis</i> | GCA_904066225.2                                                                                                                                                                                                                                                                                   |
|                          | <i>Caenorhabditis elegans</i>       | GCF_000002985.6                                                                                                                                                                                                                                                                                   |
|                          | <i>Loa loa</i>                      | GCF_000183805.1                                                                                                                                                                                                                                                                                   |
|                          | <i>Necator americanus</i>           | GCF_000507365.1                                                                                                                                                                                                                                                                                   |
|                          | <i>Plectus sambesii</i>             | GCA_002796945.1                                                                                                                                                                                                                                                                                   |
|                          | <i>Strongyloides ratti</i>          | GCF_001040885.1                                                                                                                                                                                                                                                                                   |
|                          | <i>Trichinella spiralis</i>         | GCF_000181795.1                                                                                                                                                                                                                                                                                   |
| <b>NEMERTEA</b>          | <i>Notospermus geniculatus</i>      | <a href="https://marinegenomics.oist.jp/nge_v2/">https://marinegenomics.oist.jp/nge_v2/</a>                                                                                                                                                                                                       |
| <b>ORTHONECTIDA</b>      | <i>Intoshia linei</i>               | GCA_001642005.1                                                                                                                                                                                                                                                                                   |
| <b>PHORONIDA</b>         | <i>Phoronis australis</i>           | <a href="https://marinegenomics.oist.jp/pau_v2/">https://marinegenomics.oist.jp/pau_v2/</a>                                                                                                                                                                                                       |
| <b>PLACOZOA</b>          | <i>Trichoplax adhaerens</i>         | GCF_000150275.1                                                                                                                                                                                                                                                                                   |
|                          | <i>Trichoplax spH2</i>              | GCA_003344405.1                                                                                                                                                                                                                                                                                   |
| <b>PLATYHELMINTHES</b>   | <i>Dibothriocephalus latus</i>      | GCA_900617775.1                                                                                                                                                                                                                                                                                   |
|                          | <i>Echinococcus granulosus</i>      | GCF_000524195.1                                                                                                                                                                                                                                                                                   |
|                          | <i>Fasciola hepatica</i>            | GCA_002763495.2                                                                                                                                                                                                                                                                                   |
|                          | <i>Macrostomum lignano</i>          | GCA_002269645.1                                                                                                                                                                                                                                                                                   |
|                          | <i>Opisthorchis viverrini</i>       | GCF_000715545.1                                                                                                                                                                                                                                                                                   |
|                          | <i>Protopolystoma xenopodis</i>     | GCA_900617795.1                                                                                                                                                                                                                                                                                   |
|                          | <i>Schistosoma mansoni</i>          | GCF_000237925.1                                                                                                                                                                                                                                                                                   |
|                          | <i>Schmidtea mediterranea</i>       | (MSG.1)                                                                                                                                                                                                                                                                                           |
| <b>PORIFERA</b>          | <i>Amphimedon queenslandica</i>     | GCF_000090795.1                                                                                                                                                                                                                                                                                   |
|                          | <i>Ephydatia muelleri</i>           | <a href="https://spaces.facsce.ualberta.ca/ephybase/">https://spaces.facsce.ualberta.ca/ephybase/</a>                                                                                                                                                                                             |
| <b>PRIAPULIDA</b>        | <i>Priapulul caudatus</i>           | GCF_000485595.1                                                                                                                                                                                                                                                                                   |
| <b>MESOOZOA</b>          | <i>Dicyema japonicum</i>            | GCA_011109175.1                                                                                                                                                                                                                                                                                   |
| <b>ROTIFERA</b>          | <i>Adineta ricciae</i>              | GCA_905250095.1                                                                                                                                                                                                                                                                                   |
|                          | <i>Brachionus calyciflorus</i>      | GCA_905250105.1                                                                                                                                                                                                                                                                                   |
|                          | <i>Didymodactylos carnosus</i>      | GCA_905250885.1                                                                                                                                                                                                                                                                                   |
|                          | <i>Rotaria socialis</i>             | GCA_905332285.1                                                                                                                                                                                                                                                                                   |
| <b>TARDIGRADA</b>        | <i>Hypsibius dujardini</i>          | GCA_002082055.1                                                                                                                                                                                                                                                                                   |
|                          | <i>Ramazzottius varieornatus</i>    | GCA_001949185.1                                                                                                                                                                                                                                                                                   |
| <b>XENACOELOMORPHA</b>   | <i>Praesagittifera naikaiensis</i>  | <a href="http://gigadb.org/dataset/100564">http://gigadb.org/dataset/100564</a>                                                                                                                                                                                                                   |
|                          | <i>Xenoturbella bocki</i>           | <a href="https://figshare.com/articles/dataset/Genome_of_Xenoturbella_bocki/">https://figshare.com/articles/dataset/Genome_of_Xenoturbella_bocki/</a>                                                                                                                                             |
| <b>CHOANOFLLAGELLATA</b> | <i>Monosiga brevicollis</i>         | <a href="http://ftp.ensemblgenomes.org/pub/protists/release-52/fasta/protists_choanoflagellida1_collection/monosiga_brevicollis_mx1_gca_000002865/">http://ftp.ensemblgenomes.org/pub/protists/release-52/fasta/protists_choanoflagellida1_collection/monosiga_brevicollis_mx1_gca_000002865/</a> |
|                          | <i>Salpingoeca rosetta</i>          | GCA_000188695.1                                                                                                                                                                                                                                                                                   |
| <b>FILASTEREA</b>        | <i>Capsaspora owczarzaki</i>        | GCF_000151315.2                                                                                                                                                                                                                                                                                   |
| <b>ICHTHYOSPOREA</b>     | <i>Chromosphaera perkinsii</i>      | <a href="https://figshare.com/articles/dataset/Genome_-_Chromosphaera_perkinsii/">https://figshare.com/articles/dataset/Genome_-_Chromosphaera_perkinsii/</a>                                                                                                                                     |
|                          | <i>Ichthyophonus hoferi</i>         | <a href="https://figshare.com/articles/dataset/Genome_-_Ichthyophonus_hoferi/">https://figshare.com/articles/dataset/Genome_-_Ichthyophonus_hoferi/</a>                                                                                                                                           |
|                          | <i>Pirum gemmata</i>                | <a href="https://figshare.com/articles/dataset/Genome_-_Pirum_gemmata/">https://figshare.com/articles/dataset/Genome_-_Pirum_gemmata/</a>                                                                                                                                                         |
|                          | <i>Sphaeroforma arctica</i>         | GCF_001186125.1                                                                                                                                                                                                                                                                                   |
| <b>PLURIFORMEA</b>       | <i>Corallochytrium limacisporum</i> | <a href="https://figshare.com/articles/dataset/Genome_-_Corallochytrium_limacisporum/">https://figshare.com/articles/dataset/Genome_-_Corallochytrium_limacisporum/</a>                                                                                                                           |
